# Supplementary material for: Specific detection of Cronobacter sakazakii in powdered infant formula using ssDNA aptamer
Source: Royal Society of Chemistry journal article supplement (doi:10.1039/d1an00118c), 2021-01-01
Supplement: d1an00118c1.pdf [file d1an00118c1.pdf]

## Supplementary Data

### Specific detection of *Cronobacter sakazakii* in powdered infant formula using ssDNA aptamer

Hye Ri Kim<sup>a,b</sup>, Myunghye Kim<sup>c</sup> and Byoung Chan Kim<sup>a,b,\*</sup>

<sup>a</sup> Center for Environment, Health and Welfare Research, Korea Institute of Science and Technology (KIST), Hwarangno 14-gil 5, Seongbuk-gu, Seoul 02792, Republic of Korea

<sup>b</sup> Division of Energy and Environment Technology, KIST School, University of Science and Technology (UST), Hwarangno 14-gil 5, Seongbuk-gu, Seoul 02792, Republic of Korea

<sup>c</sup> Department of Food Science and Technology, Yeungnam University, 280 Daehak-ro, Gyeongsan-si, Gyeongsangbuk-do 38541, Republic of Korea

\* Corresponding author

Byoung Chan Kim, Ph.D.

Tel: + 82 2 958 5877

Fax: + 82 2 958 5805

E-mail address: [bchankim@kist.re.kr](mailto:bchankim@kist.re.kr) (B.C. Kim)

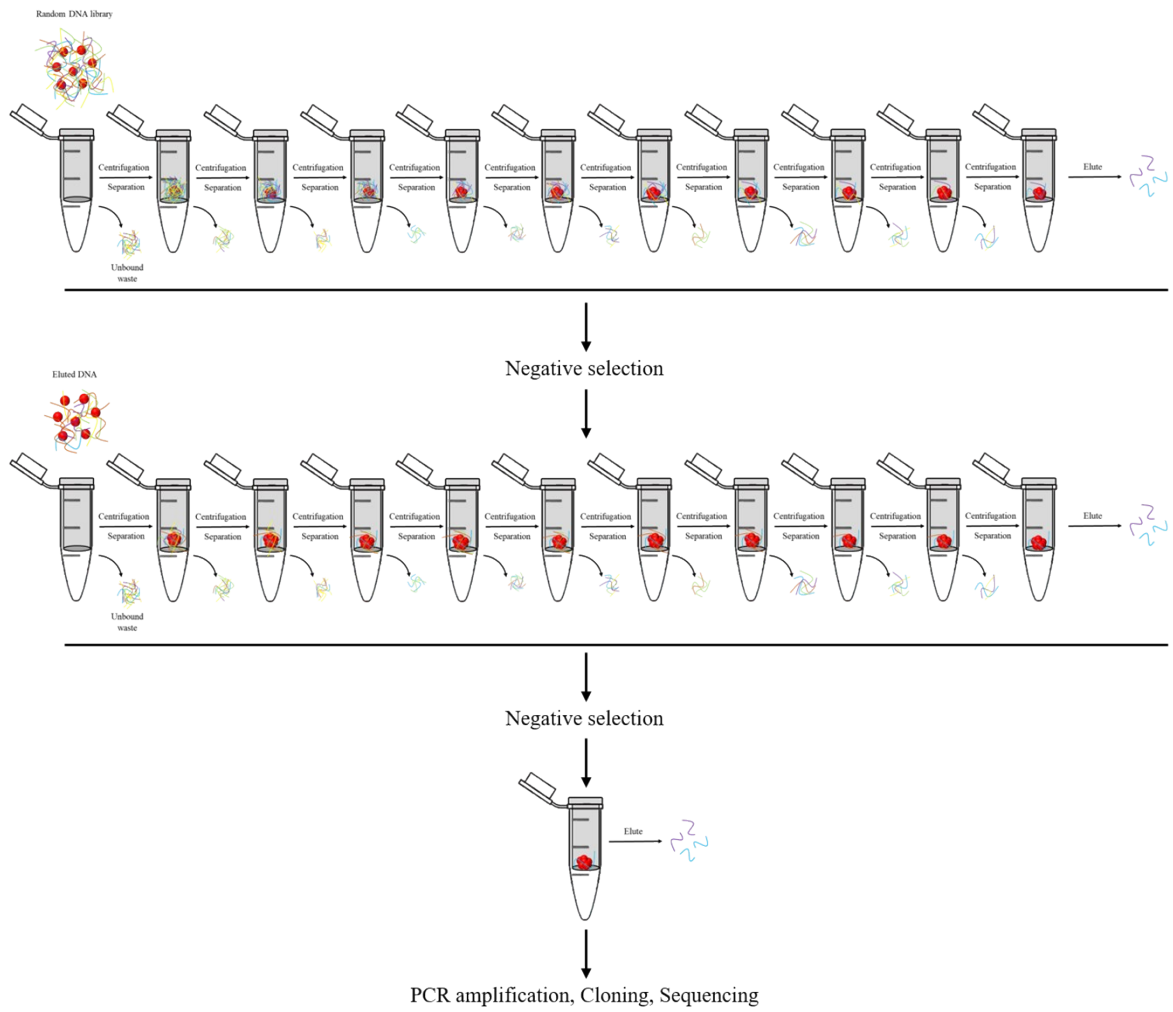

**Figure S1.** Schematic representation of a centrifugation-based partitioning method (CBPM).

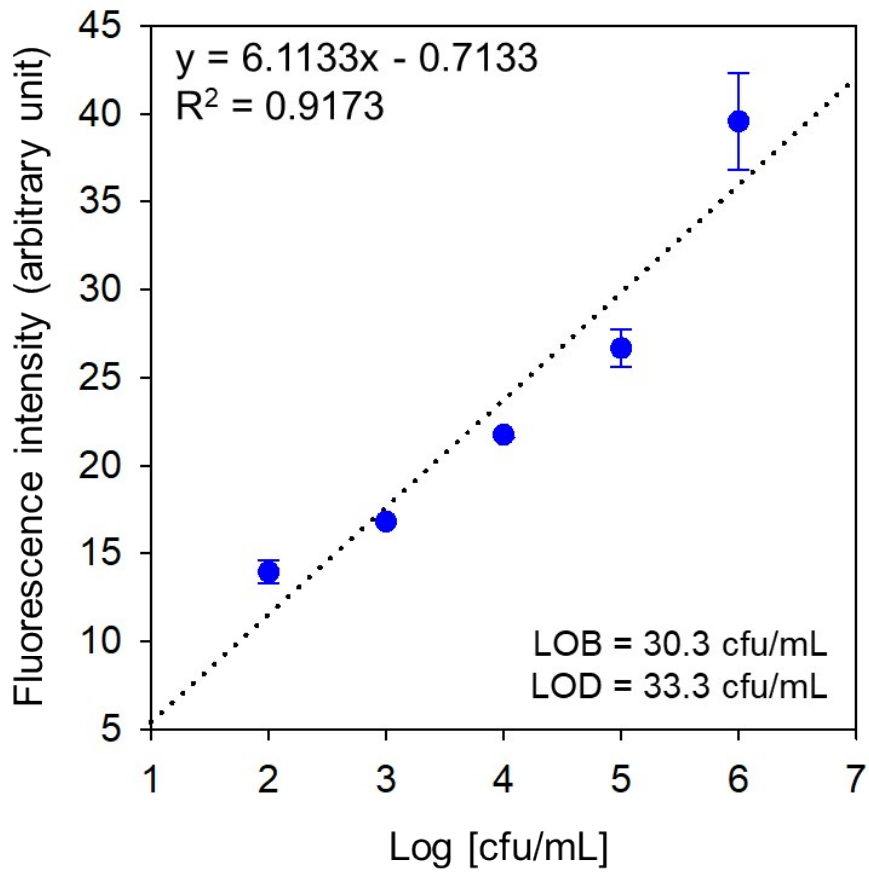

**Figure S2.** The calibration curve of *Cronobacter sakazakii* detection in range of  $10^2 - 10^6$  cfu/ml.

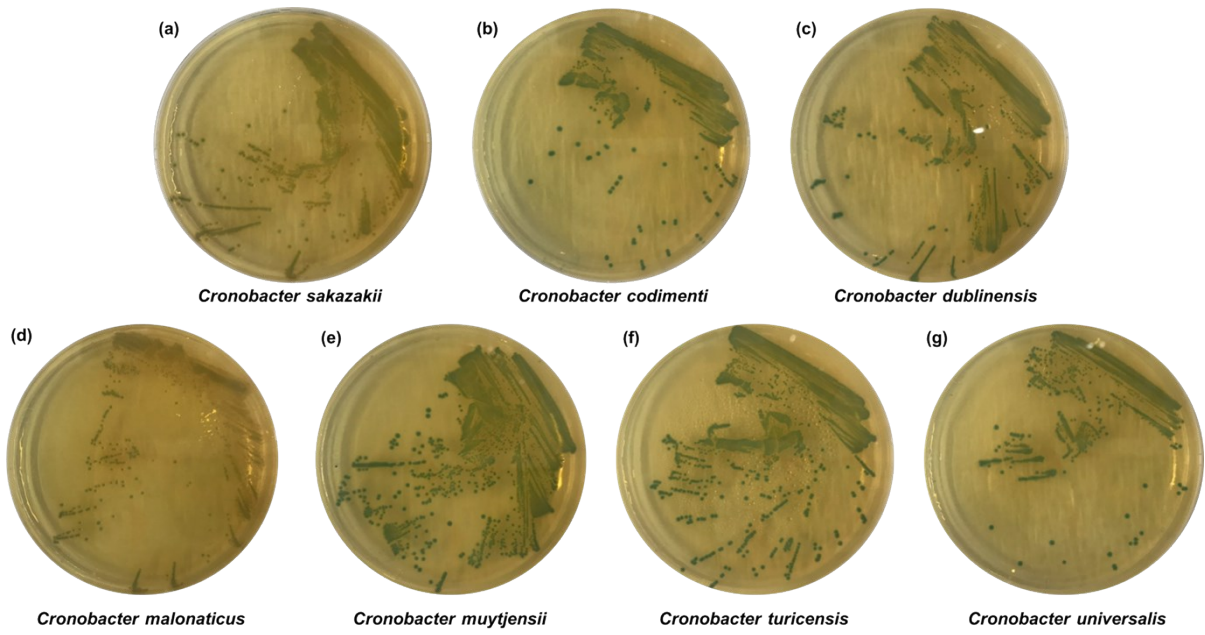

**Figure S3.** Images of seven *Cronobacter* species grown on CESA agar plates.
